# Supplementary material for: Disclosing the superior lithium storage of double-shelled Si@N-doped carbon: a synergic combination of experiment and theory
Source: Royal Society of Chemistry journal article supplement (doi:10.1039/d2se01571d), 2022-12-30
Supplement: d2se01571d1.pdf [file d2se01571d1.pdf]

## **Supporting Information**

### **Disclosing the Superior Lithium Storage of Double-Shelled Si@N-Doped**

### **Carbon: A Synergic Combination of Experiment and Theory**

Muhammad K. Majeed,<sup>a,b\*</sup> Rashid Iqbal,<sup>c</sup> Arshad Hussain,<sup>c</sup> Mina Lotfi,<sup>a</sup> M. Umar Majeed,<sup>e</sup> M. Zeeshan Ashfaq,<sup>f</sup> M. Sufyan Javed,<sup>g</sup> Muhammad Ahmad,<sup>c</sup> Adil Saleem,<sup>h\*</sup>

<sup>a</sup> *State Key Laboratory of Catalysis, Dalian Institute of Chemical Physics, Chinese Academy of Sciences, Dalian, China.*

<sup>b</sup> *Materials Chemistry Laboratory, Department of Materials Science & Engineering, The University of Texas at Arlington, Arlington, TX, 76019, United States*

<sup>c</sup> *Institute for Advanced Study, College of Electronic and Information Engineering, Shenzhen University, Shenzhen, China.*

<sup>d</sup> *Center for Advanced Construction Materials, The University of Texas at Arlington, Arlington, TX, 76019, United States*

<sup>e</sup> *Institute of Physics and Electronics, Gomal University, D. I. Khan, Pakistan.*

<sup>f</sup> *School of Materials Science and Engineering, Shandong University, Jinan, China.*

<sup>g</sup> *School of Physical Science and Technology, Lanzhou University, Lanzhou, China.*

<sup>h</sup> *College of Mechatronics and Control Engineering, Shenzhen University, Shenzhen, China.*

### **Corresponding authors**

Muhammad K. Majeed (Email: [drmkm@dicp.ac.cn](mailto:drmkm@dicp.ac.cn))

Adil Saleem (Email: [adilsaleem@szu.edu.cn](mailto:adilsaleem@szu.edu.cn))

### **This file includes:**

Figures S1 to S9, Tables S1.

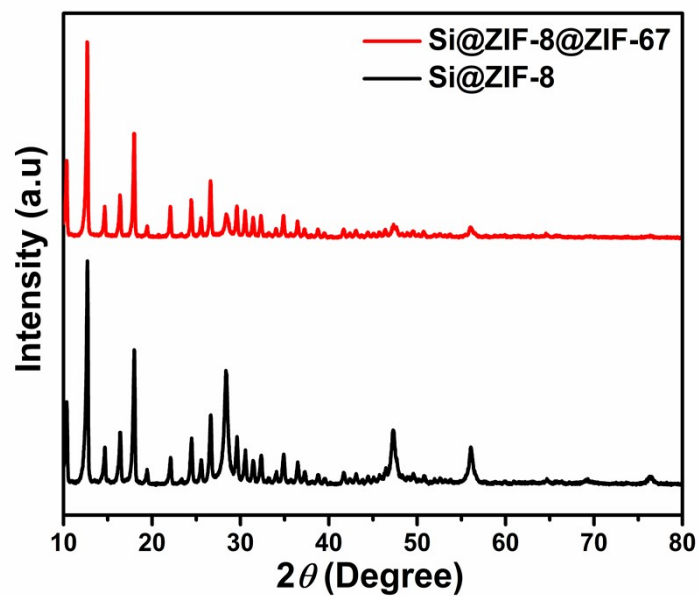

**Figure S1:** XRD pattern of single-shelled Si@ZIF-8 and double-shelled Si@ZIF-8@ZIF-67.

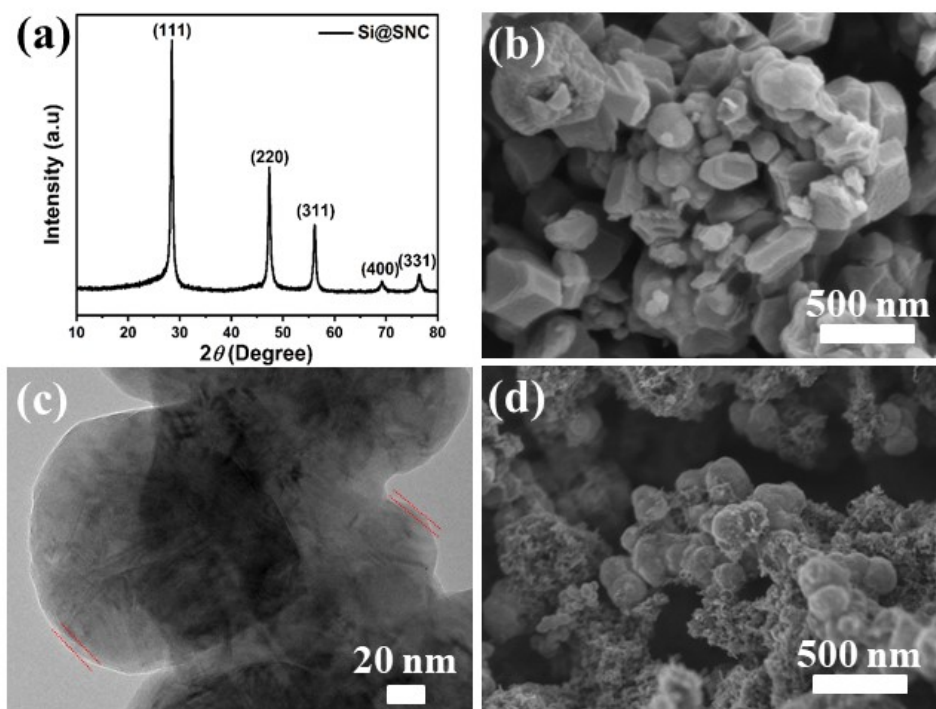

**Figure S2:** (a) XRD pattern of Si@SNC, (b) SEM image of Si@ZIF-8, (c) TEM image, and (d) SEM image of Si@SNC.

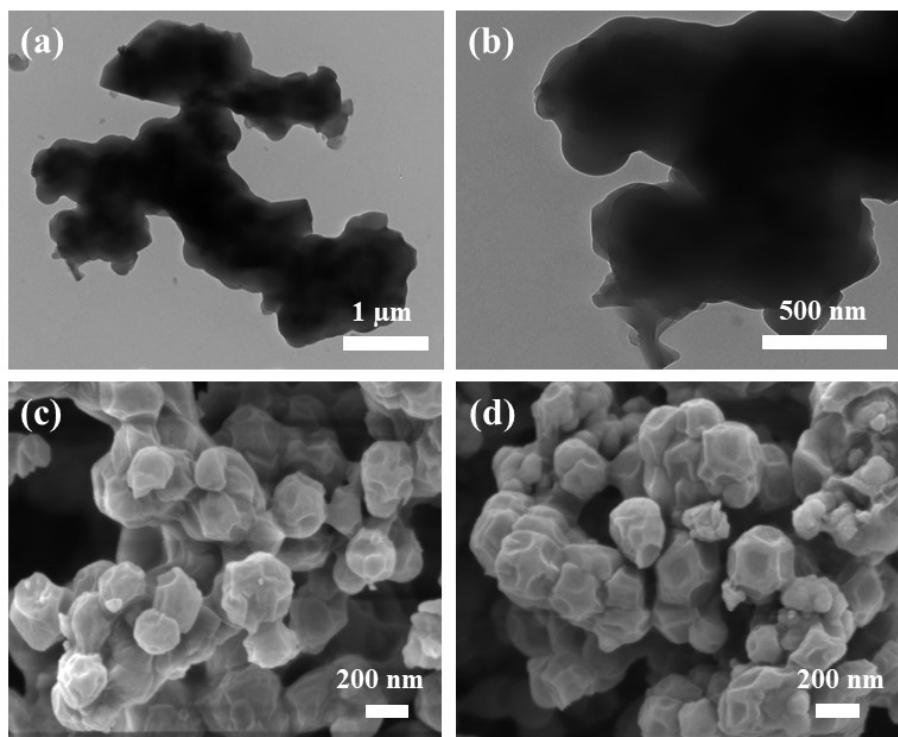

**Figure S3:** (a, b) TEM and (c, d) SEM images of Si@ZIF-8@ZIF-67.

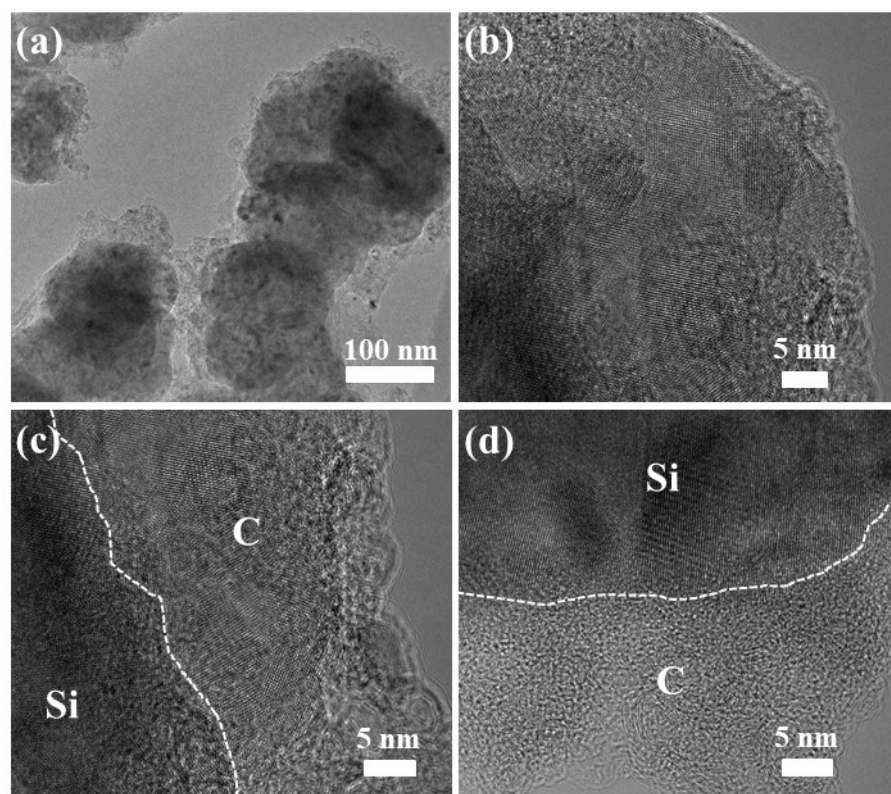

**Figure S4:** HRTEM images of double-shelled Si@DNC.

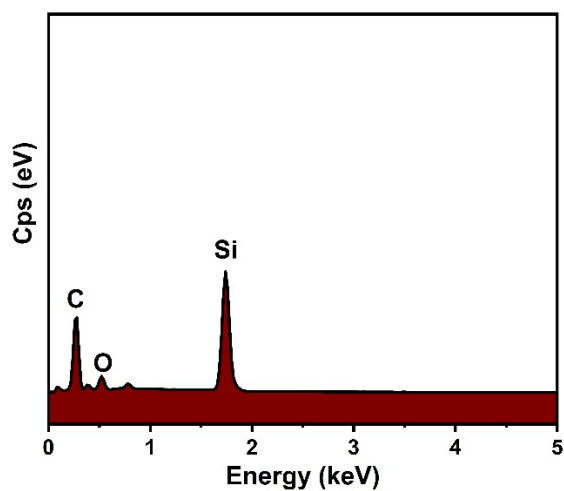

**Figure S5:** EDS spectrum of double-shelled Si@DNC.

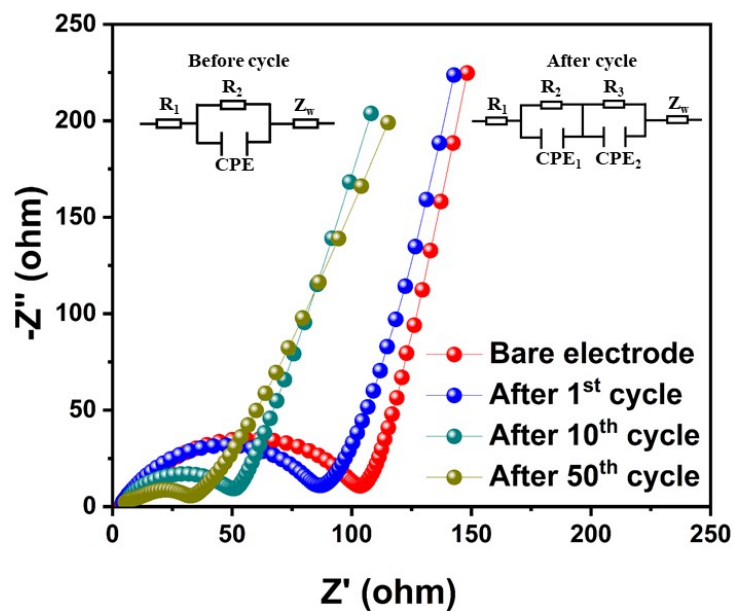

**Figure S6:** Electrochemical impedance spectra of Si@DNC for bare electrode, after 1<sup>st</sup> cycle, 10<sup>th</sup> cycles, and 50<sup>th</sup> cycles.

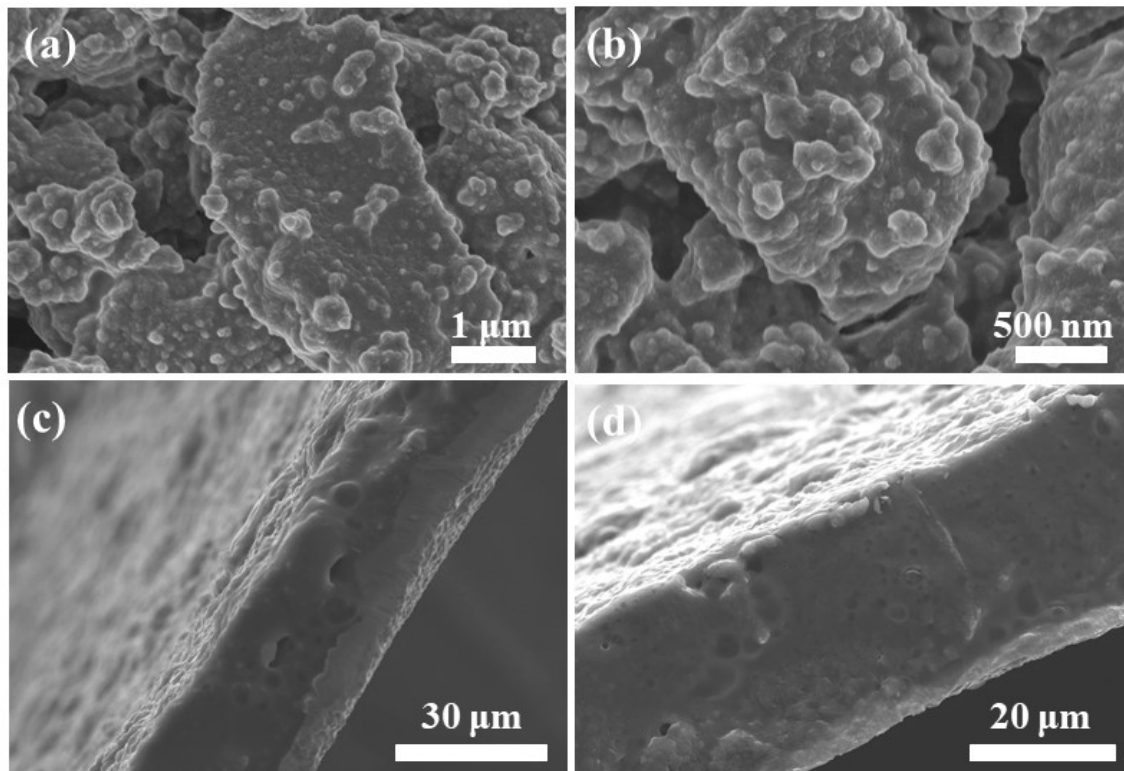

**Figure S7:** (a-d) SEM images of double-shelled Si@DNC cyclic electrode.

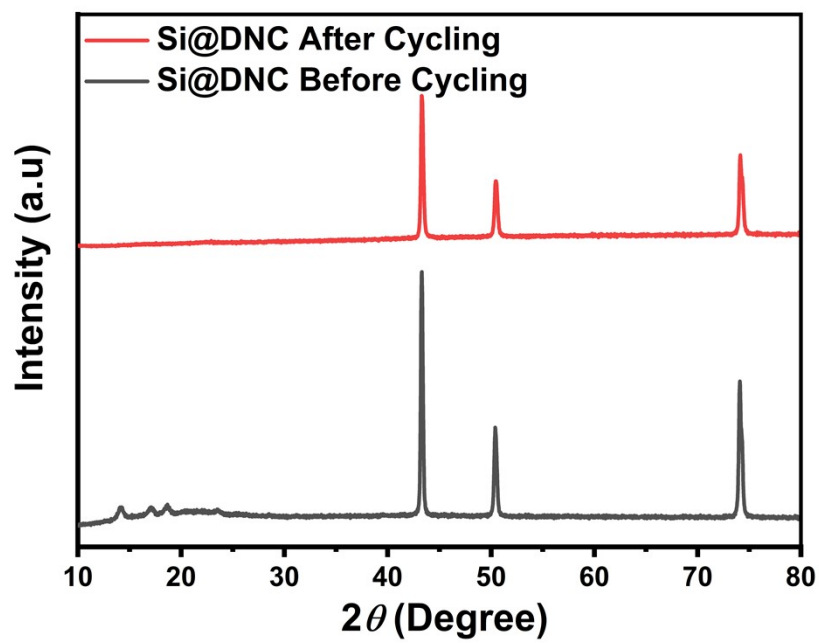

**Figure S8:** XRD patterns of Si@DNC electrode before and after 300 cycles.

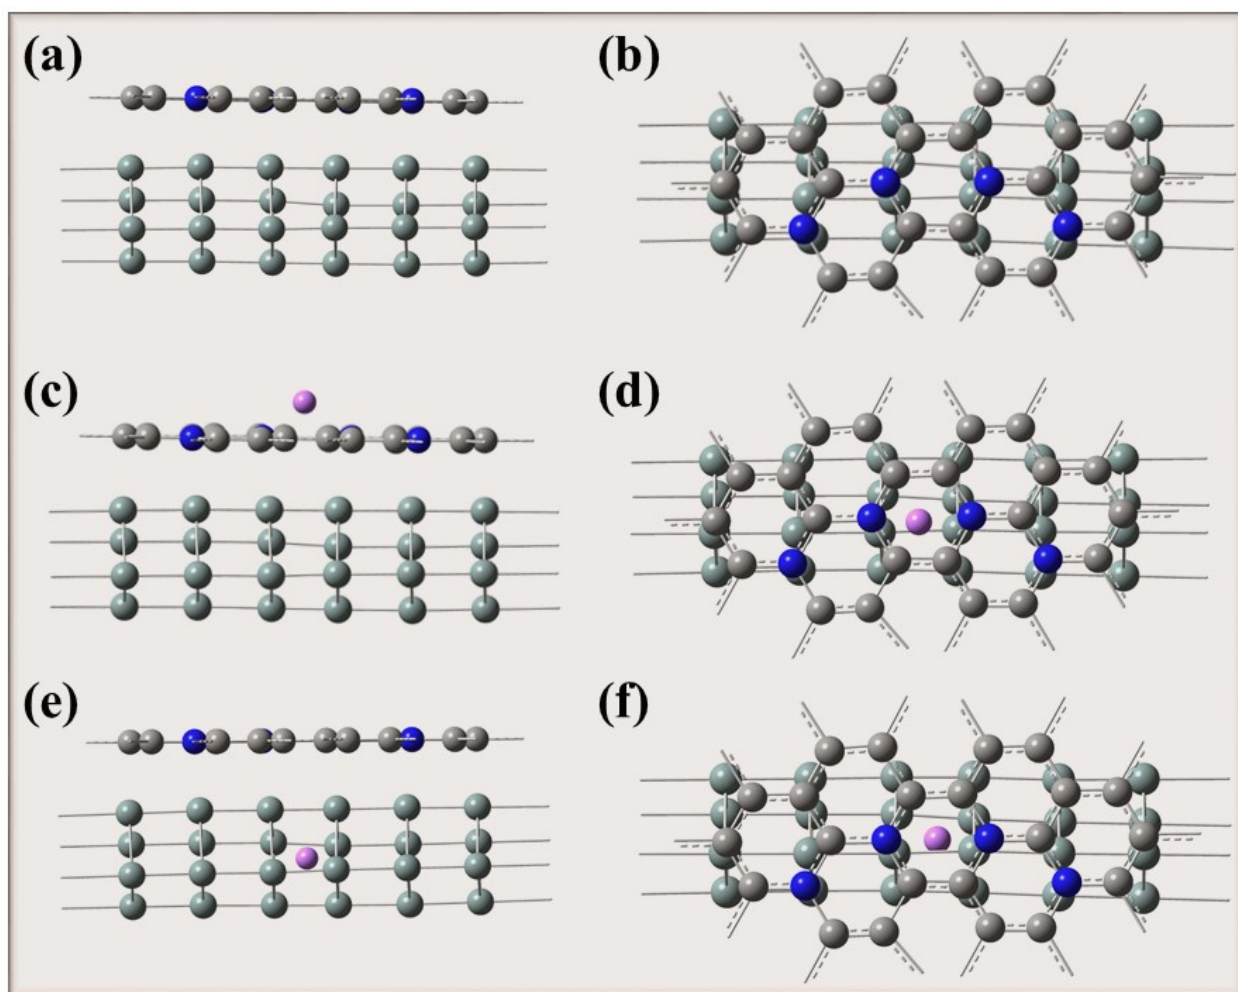

**Figure S9:** (a-c) side view and (d-f) top view of optimized lithiation mechanism of single shelled Si@SNC.

**Table S1.** Calculated quantum molecular descriptors (eV) for optimized lithiation mechanism.

| Materials            | HOMO  | LUMO  | E<br>(RB3LYP) | B.E.   | E <sub>HOMO</sub> | E <sub>LUMO</sub> | E <sub>g</sub> | I=-<br>E <sub>HOMO</sub> | A=-<br>E <sub>LUMO</sub> | μ<br>(Debye) | η     | ω      |
|----------------------|-------|-------|---------------|--------|-------------------|-------------------|----------------|--------------------------|--------------------------|--------------|-------|--------|
| N-carbon             | 0.20  | -0.11 | -628.88       | -      | -5.46             | -312              | 2.34           | 5.46                     | 3.12                     | -4.29        | 1.17  | 7.87   |
| N, N-carbon          | -0.11 | -0.06 | -645.37       | -      | -3.07             | -1.65             | 1.42           | 3.07                     | 1.65                     | -2.36        | 0.71  | 3.92   |
| Si                   | -0.21 | -0.12 | -2879.70      | -      | -5.85             | -3.44             | 2.41           | 5.85                     | 3.44                     | -4.64        | 1.20  | 8.95   |
| Li                   | -1.90 | -0.05 | -7.45         | -      | -51.87            | -1.41             | 50.46          | 51.87                    | 1.41                     | -26.65       | 25.23 | 14.06  |
| N-N-carbon-Si        | -0.20 | -0.11 | -3674.83      | -8.69  | -5.50             | -3.12             | 2.38           | 5.50                     | 3.12                     | -4.31        | 1.19  | 7.81   |
| Li-N-N-carbon-Si     | -0.17 | -0.15 | -3682.39      | -11.36 | -4.67             | -4.13             | 0.55           | 4.67                     | 4.13                     | -4.40        | 0.27  | 35.85  |
| N, N-carbon-Si-Li    | -0.17 | -0.16 | -3682.41      | -11.94 | -4.61             | -4.30             | 0.31           | 4.61                     | 4.30                     | -4.46        | 0.16  | 64.02  |
| N-carbon-N-carbon-Si | -0.16 | -0.15 | -4303.71      | -8.61  | -4.28             | -3.97             | 0.32           | 4.28                     | 3.97                     | -4.13        | 0.16  | 54.89  |
| Li-carbon-carbon-Si  | -0.15 | -0.14 | -4311.12      | -7.14  | -4.11             | -3.88             | 0.23           | 4.11                     | 3.88                     | -4.00        | 0.12  | 69.39  |
| Carbon-Li-carbon-Si  | 0.16  | -0.15 | -4310.99      | -3.90  | -4.25             | -4.21             | 0.04           | 4.25                     | 4.21                     | -4.23        | 0.02  | 447.32 |
| Carbon-Carbon-Si-Li  | -0.17 | -0.17 | -4311.05      | -3.31  | -4.74             | -4.66             | 0.08           | 4.74                     | 4.66                     | -4.70        | 0.04  | 276.13 |
